# Supplementary material for: Garlic Volatile Diallyl Disulfide Induced Cucumber Resistance to Downy Mildew
Source: MDPI journal article supplement (doi:10.3390/ijms222212328), 2021-11-15
Supplement: s1 [file s1]

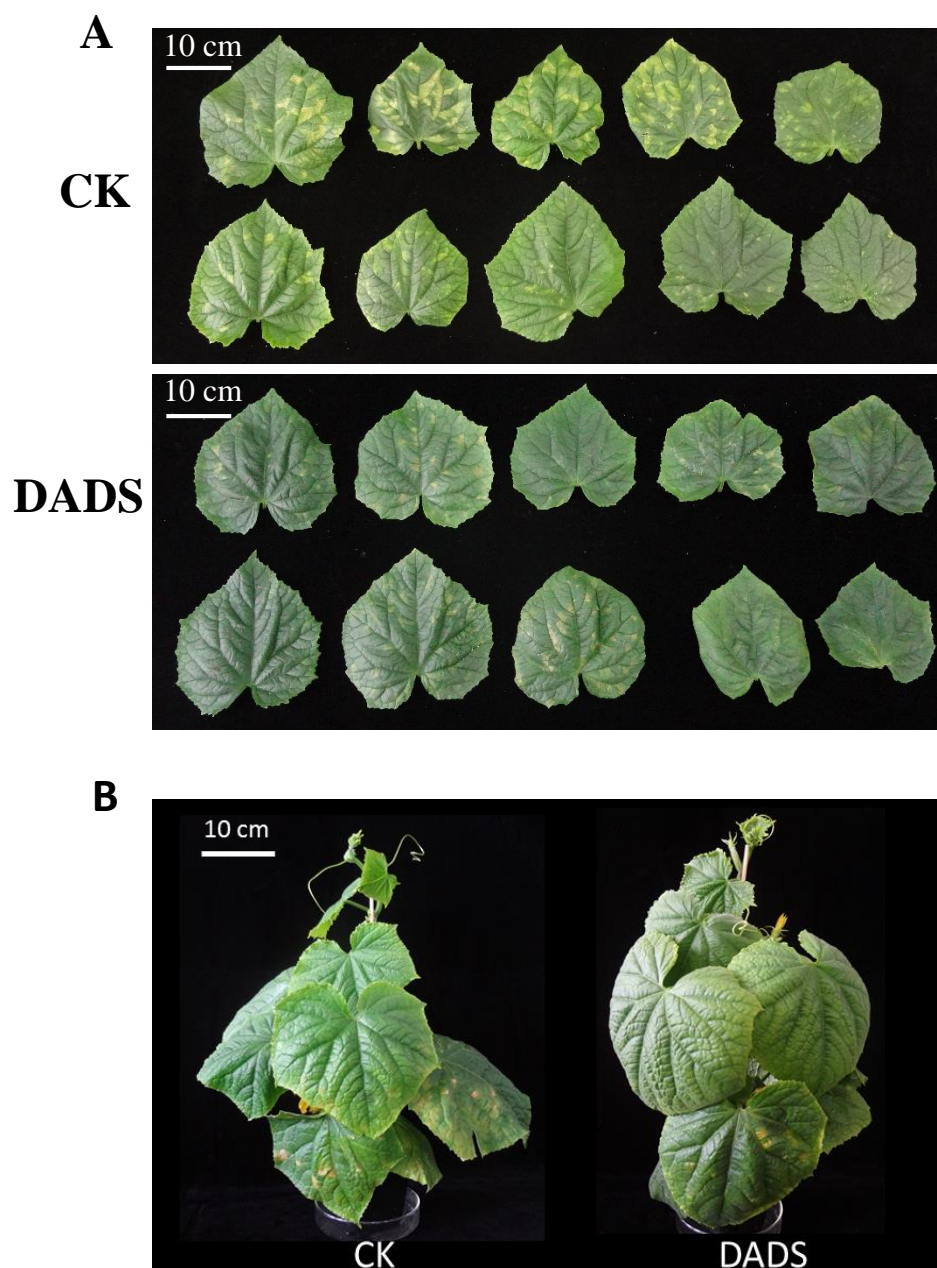

**Supplementary Figure S1.** Compares in cucumber phenotype of DADS group and CK group. (A) 7 days of inoculation, (B) 14 days of inoculation.

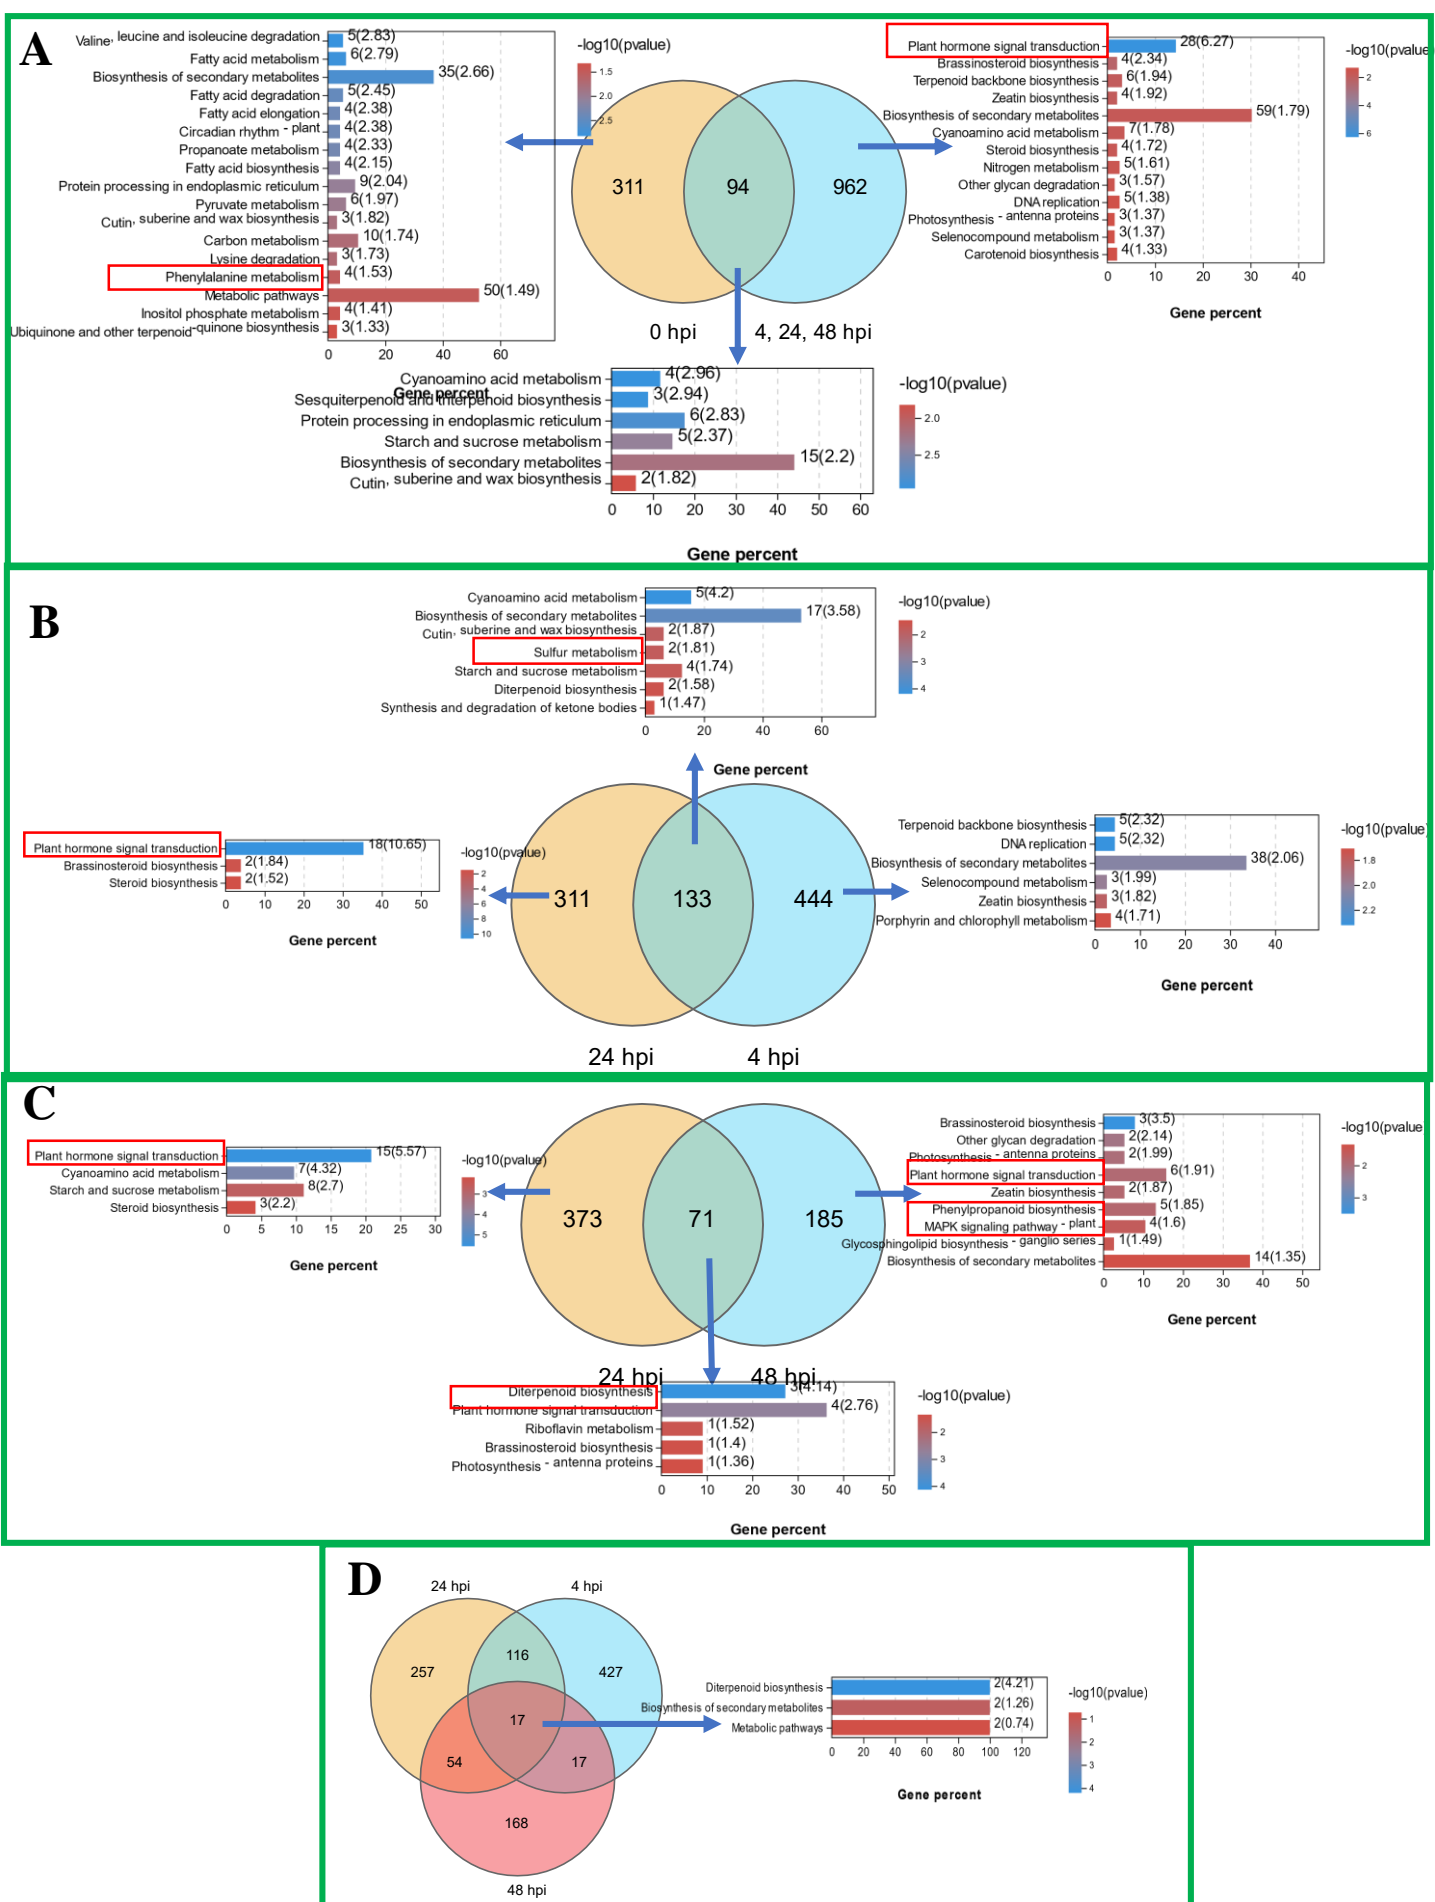

**Supplementary Figure S2.** Venn analysis and KEGG enrichment analysis of up-regulated DEGs.

A

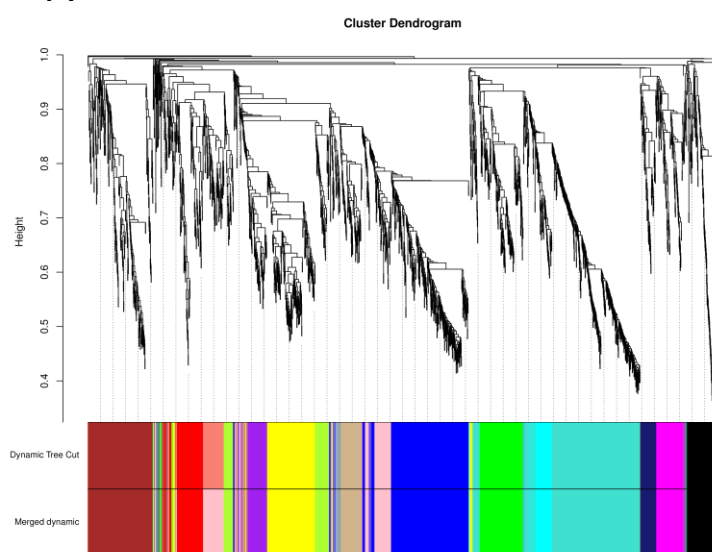

B

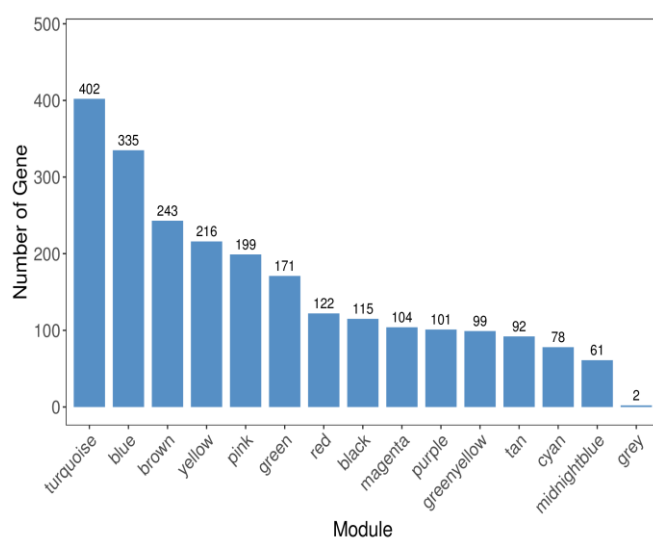

**Supplementary Figure S3.** The decision of network analysis dendrogram showing modules and module gene numbers identified by WGCNA of up-regulated DEGs. (A) Dendrogram plot with color annotation. (B) Gene numbers of every module.

A

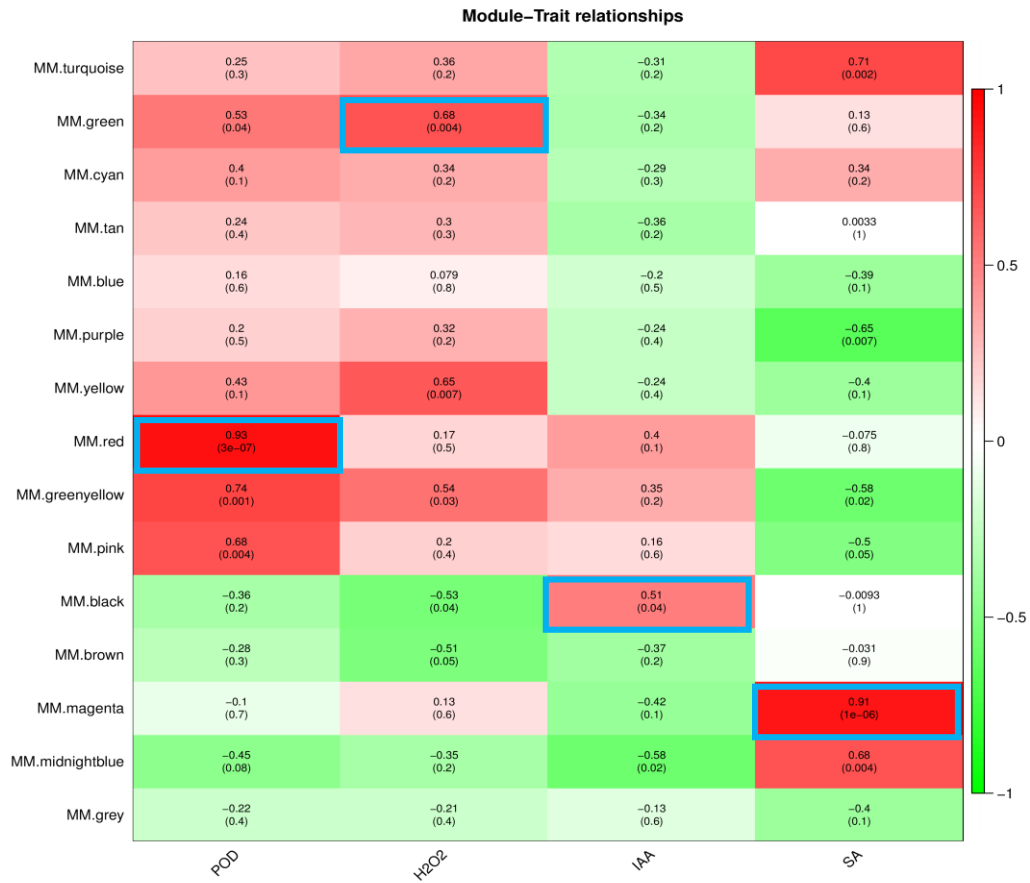

B

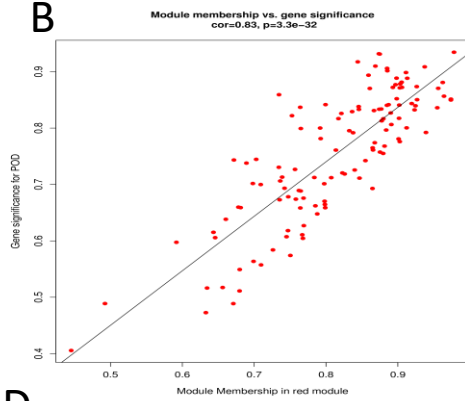

C

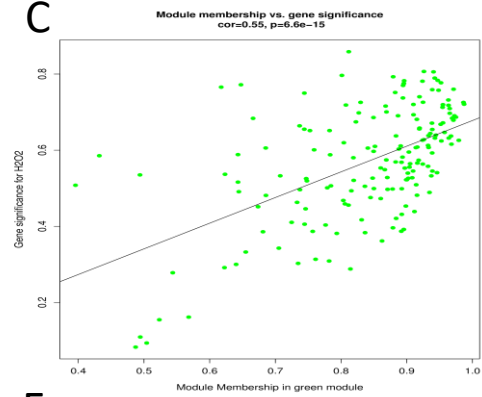

D

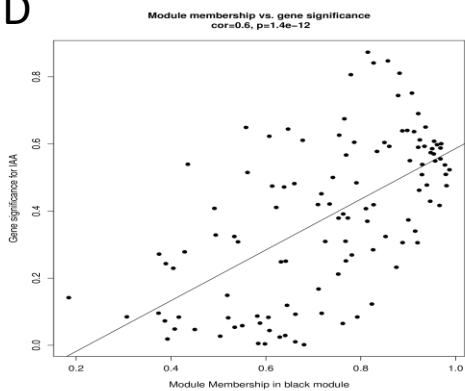

E

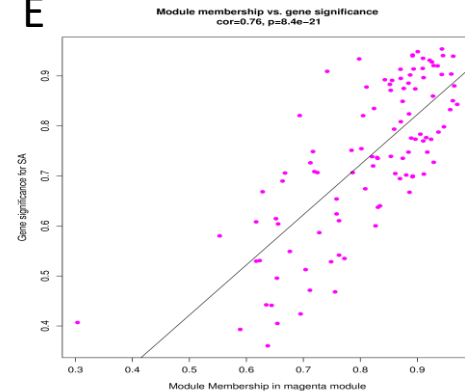

**Supplementary Figure S4.** Module-trait weight correlations and corresponding P-values, MM and GS relation for modules by WGCNA.

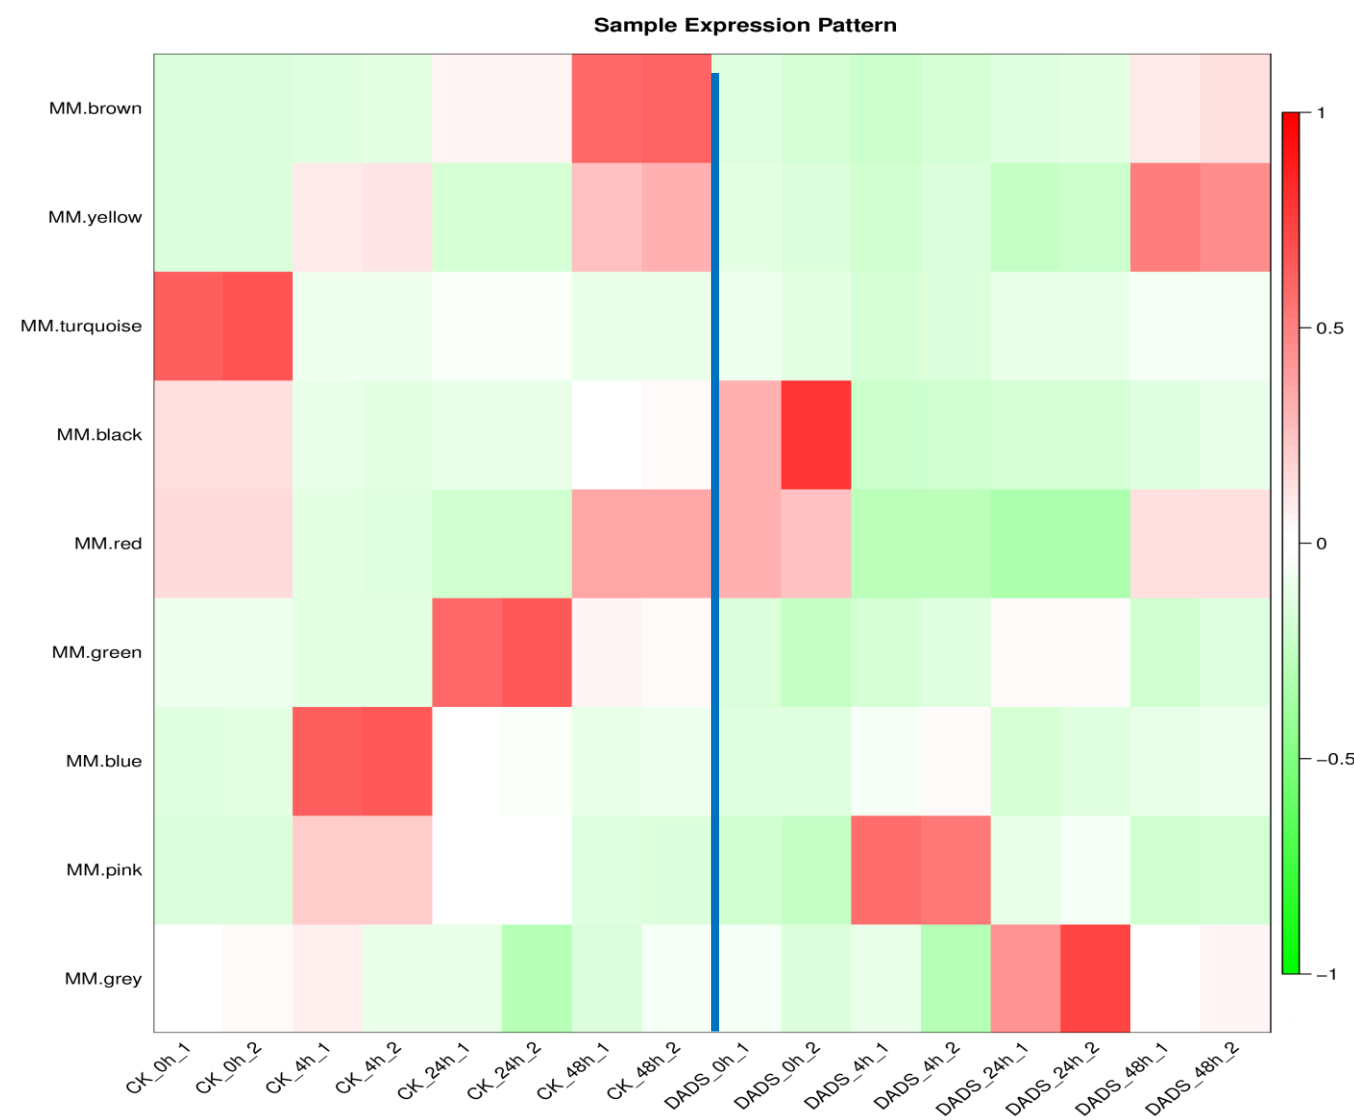

| Pathway                           | Module |       |      |
|-----------------------------------|--------|-------|------|
| Phenylpropanoid biosynthesis      | pink   |       |      |
| Plant hormone signal transduction | blue   | green | pink |

**Supplementary Figure S5 .** Expression modules constructed WGCNA and associated KEGG of down-regulated DEGs in the pink’, ‘green’, ‘blue’ modules.

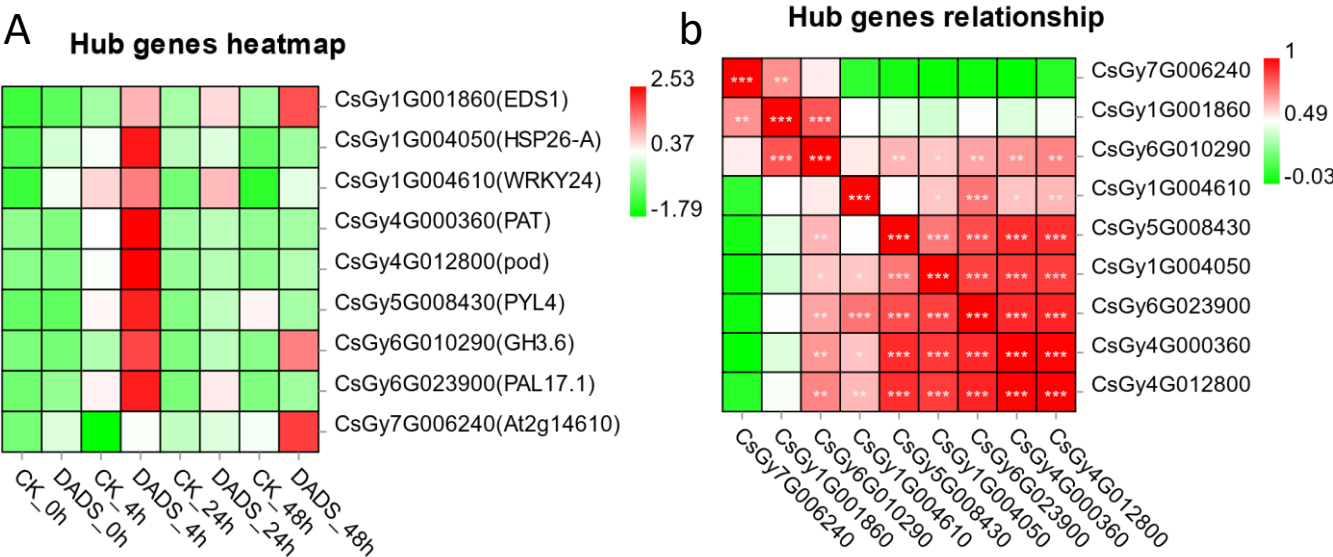

**Supplementary Figure S6.** Hub genes expression (A) and correlation analysis (B) in modules.
