# Supplementary material for: Garlic Volatile Diallyl Disulfide Induced Cucumber Resistance to Downy Mildew
Source: Int J Mol Sci. 2021 Nov 15;22(22):12328. doi: 10.3390/ijms222212328 (PMC8625977; doi:10.3390/ijms222212328)
Supplement: Supplementary file 1 [file ijms-22-12328-s001.zip › Supplementary Table .xlsx]

## Sheet: Table S1
Supplementary Table 1. Sequence information of primers used for qPCR
No.	Gene Id	Primer Name	Primer Sequence
1	CsGy4G012850	POD F	GAGTGCTTGTCCAGGAGTTG
		POD R	AGTTTGAGGTTCCAGTTCTATTG
2	CsGy6G018080	CAT F	CTCCCAAATGTCCTCACCAT
		CAT R	TGATTCTCTTTCGGTATCACACAC
3	CsGy1G021930	cAPX F	GTTCCTTTCCACCCTGGTAGAG
		cAPX R	ACAATGTCCTGGTCCGAAAG
4	CsGy6G024740	MDAR F	TAAACAACTTTGATGTCAGCATG
		MDAR R	GTGAAGCCTACAGCGACT
5	CsGy2G003440	SOD F	TTGTCCATGCAGATCCTGATG
		SOD R	TCACTCTTGCAGCCCAATAAC
6	CsGy5G002750	GPX F	GTGGAACTTCTCCAAGTTCTTG
		GPX R	GCAACTCCCAGCAGTTTCTTC
7	CsGy4G003680	DIR1 F	CAACTCAAAAGAGAGAGAGAGAGGA
		DIR1 R	TCCATAATTGAACACACACTTCC
8	CsGy7G013600	DIR1 F	AACAAACCAAAGTTTTCGAGCTA
		DIR1 F	AACAAAAGAAAATCCAAACCTCAT
9	CsGy5G003280	SGR F	CATGGAATGGTTCCTATGGCG
		SGR R	TGTGTGAGCGTATAAGTCCTTGG
10	CsGy6G017800	SGRL F	TCAAAGGAACAACCCTGCTC
		SGRL R	CAAATCTTGCTGGAGGAACC

## Sheet: Table S2
Supplementary Table 2. Summary of transcriptome sequencing data
Sample	Raw Reads	Clean Reads	GC content	Q30	Mapped Reads
CK_0h_1	24589238	24561062 (99.89%)	0.4573	0.9422	23250556 (96.55%)
CK_0h_2	22616654	22499424 (99.48%)	0.4491	0.9448	20831536 (96.31%)
CK_4h_1	25253726	25212832 (99.84%)	0.4495	0.9406	23468370 (95.84%)
CK_4h_2	69365390	69260252 (99.85%)	0.4469	0.9411	66075445 (96.77%)
CK_24h_1	72036470	71936718 (99.86%)	0.4522	0.9402	67124099 (95.90%)
CK_24h_2	70487132	70393680 (99.87%)	0.4523	0.9439	65449369 (95.85%)
CK_48h_1	22713748	22680468 (99.85%)	0.4561	0.9444	21668609 (97.05%)
CK_48h_2	19951118	19925842 (99.87%)	0.4608	0.9426	18151061 (94.81%)
DADS_0h_1	24970210	24932884 (99.85%)	0.4632	0.9375	23160242 (95.09%)
DADS_0h_2	27934488	27885132 (99.82%)	0.4658	0.9422	24496245 (92.46%)
DADS_4h_1	68805460	68650592 (99.77%)	0.448	0.9413	64621378 (96.16%)
DADS_4h_2	63672956	63543294 (99.80%)	0.4485	0.9446	59655205 (96.27%)
DADS_24h_1	76804190	76682682 (99.84%)	0.4523	0.9388	71236670 (95.81%)
DADS_24h_2	21815192	21775332 (99.82%)	0.4512	0.9366	20372337 (96.11%)
DADS_48h_1	22710028	22680380 (99.87%)	0.455	0.9409	21640496 (96.73%)
DADS_48h_2	20585066	20557868 (99.87%)	0.456	0.9428	19516098 (96.54%)

## Sheet: Table S3
Supplementary Table 3. Heatmap of DEGs of DADS group and CK group with P. cubensis infection
		log2(fc) (DADS/CK)
Pathway	Gene_Id	0 hpi	4 hpi	24 hpi	48 hpi	Symbol	Description
Plant-pathogen metabolism	CsGy0G000440	-0.798221	0.0430349	0.25268	-1.09361	MYB106	myb-related protein 306-like
	CsGy1G000630	2.63883	0.384664	1.99486	4.3762	CML38	putative calcium-binding protein CML19
	CsGy1G001860	0.832446	1.12282	0.898878	1.58575	EDS1	protein EDS1L-like
	CsGy1G002880	-0.314228	2.05662	0.722319	-0.428552	RBOHB	respiratory burst oxidase homolog protein A-like isoform X1
	CsGy1G003820	-0.299304	0.705712	1.17629	1.94639	--	transcription factor MYB24-like
	CsGy1G004610	1.32278	0.311669	1.10436	1.43345	WRKY24	probable WRKY transcription factor 33
	CsGy1G005340	-3.16749	1.04708	0.0923014	-0.0818242	--	myb domain protein 31
	CsGy1G006530	-0.427749	1.1168	2.71127	2.612	MYB62	transcription factor MYB108-like
	CsGy1G025590	0.248066	1.83419	-0.109895	1.61565	HSC80	Chaperone protein HtpG
	CsGy1G025610	0.163018	1.05289	0.0765496	1.64695	HSC80	Chaperone protein HtpG
	CsGy1G025750	-0.938599	-1.44459	0.335603	-0.0978473	RBOHB	Respiratory burst oxidase homolog protein B
	CsGy2G007680	0.467878	0.308038	0.453244	1.35325	At1g61180	disease resistance protein At4g27190-like isoform X1
	CsGy2G010410	3.17969	1.64119	2.86526	2.14193	MYB14	myb-related protein Myb4-like
	CsGy2G016190	-0.199706	0.329622	2.31079	1.07151	MYB330	myb domain protein 9
	CsGy2G020670	-0.649178	1.16491	-0.172517	2.38578	HSP90	Chaperone protein HtpG
	CsGy3G004390	0.300273	1.3728	0.130385	0.227353	CML21	probable calcium-binding protein CML21
	CsGy3G007650	-1.82435	0.386661	-0.0700753	-0.328199	KCS1	3-ketoacyl-CoA synthase
	CsGy3G012080	0	4.11548	0	0	MYB30	Myb-related transcription factor
	CsGy3G012780	-2.12691	-0.431424	-0.689527	-0.632961	KCS20	3-ketoacyl-CoA synthase
	CsGy3G012840	1.55915	1.47773	1.51429	2.71495	CAM4	Calmodulin-like protein 11
	CsGy3G015180	-1.21378	1	-0.490909	3.38112	CP1	calmodulin
	CsGy3G015280	1.63743	-0.279894	2.44135	1.42183	MYB108	transcription factor MYB108
	CsGy3G017340	-2.46547	2.07039	-0.36995	4.30443	HSP83A	Chaperone protein HtpG
	CsGy3G017450	0.122063	0.746407	0.315159	1.16375	SGT1	protein SGT1 homolog
	CsGy3G018030	-0.162665	-0.349949	-0.327396	2.87728	MYB73	transcription factor MYB44-like
	CsGy3G024800	0.727315	0.903177	1.75442	1.4027	CNGC1	cyclic nucleotide-gated ion channel 1-like isoform X2
	CsGy3G024840	-1.89956	0.888432	0.373342	1.16796	CNGC1	Cyclic nucleotide-gated ion channel 1
	CsGy3G028680	2.66799	0.522494	2.12097	1.3885	WRKY33	probable WRKY transcription factor 26
	CsGy3G029070	1.11817	-0.420793	-0.116853	0.0312059	CPK13	calcium-dependent protein kinase 13
	CsGy3G033330	-0.162271	1.72085	-0.200533	1.558	CPK17	calcium-dependent protein kinase 26-like
	CsGy3G036650	1.95109	-0.227209	0.633155	0.464274	MYB306	myb-related protein 306-like
	CsGy3G038490	2.59245	0.28774	0.944862	0.861663	RBOHC	respiratory burst oxidase homolog protein C
	CsGy3G039950	-1.12956	0.851701	0.764646	2.55979	CML41	Calmodulin
	CsGy3G042190	-2.90689	-1.20804	-1.08635	-0.786307	CNGC14	Probable cyclic nucleotide-gated ion channel 14
	CsGy4G002770	-0.36995	0.361479	1.59021	0.519374	CPK32	calcium-dependent protein kinase 24
	CsGy4G003300	0.258045	-1.58102	0.204268	-0.127516	CML3	Calcium-binding protein
	CsGy4G005820	1.34792	2.34863	3.1822	-1.0199	WRKY29	probable WRKY transcription factor 29
	CsGy4G005930	0.00167366	0.368782	0.208693	1.11535	CPK3	calcium-dependent protein kinase 3
	CsGy5G005810	-0.482601	0.30544	0.544996	0	CML44	probable calcium-binding protein CML44
	CsGy5G012630	-0.549873	-0.621355	0.00720074	1.4127	HSP90-5	Chaperone protein htpG family protein isoform 1
	CsGy5G015000	-0.446516	2.40312	1.09311	2.60842	MYB20	myb domain protein 43
	CsGy5G024720	-2.21464	0.470038	0.214026	-0.272833	CUT1	3-ketoacyl-CoA synthase
	CsGy5G028420	3.07437	1.45862	1.43273	2.03654	CML45	Calcium ion binding protein
	CsGy6G003370	-2.04087	0.0712587	-1.51921	1.88314	MYB62	transcription factor MYB108-like
	CsGy6G009210	-0.429414	0.423443	0.181479	1.25506	HSP90-6	Chaperone protein HtpG
	CsGy6G010860	-0.0330839	1.36804	-0.419996	0.265056	PTI6	ethylene-responsive transcription factor ERF069-like
	CsGy6G019460	0.571906	2.07308	0.889342	4.98893	CML44	probable calcium-binding protein CML44
	CsGy6G033760	-5.42986	1.14505	0.0354987	1.08246	--	transcription factor MYB34-like
	CsGy6G035490	3.49823	0.883938	1.02103	-0.352742	FLS2	Leucine-rich receptor-like protein kinase family protein
	CsGy7G003810	1.93455	2.2406	1.49643	1.03562	--	transcription factor WER-like
	CsGy7G006240	0.436395	1.35378	0.101102	0.581771	At2g14610	Cysteine-rich venom protein
	CsGy7G015260	-0.243975	-0.191796	0.141062	1.50144	TUFA	Elongation factor Tu
	CsGy7G016810	-0.787006	0.581972	2.12367	0.621488	MYB78	transcription factor MYB108-like
	MSTRG.10011	-2.79008	0.5025	2.94753	1.83999	P	PREDICTED: myb-related protein P-like [Cucumis sativus]
	MSTRG.18783	0	3.97881	-1.36538	3.37234	At2g14610	PREDICTED: pathogenesis-related protein 1-like [Cucumis sativus]
Phenylpropanoid biosynthesis	CsGy1G029430	0.378276	1.82546	0.258354	-0.0337488	RG	beta-glucosidase 12
	CsGy7G005040	1.16197	1.38944	2.33727	0.609371	poxN1	Peroxidase
	CsGy4G012800	-0.16911	1.49389	0.726708	0.825678	pod	Peroxidase
	CsGy4G012810	0.503137	2.41944	0.722761	-1.44297	pod	Peroxidase
	CsGy4G012830	2.03228	2.00394	0.560091	-2.54678	pod	Peroxidase
	CsGy4G012850	-3.02308	2.02176	2.76047	1.12106	pod	Peroxidase
	CsGy5G005040	-2.95777	2.48207	0.885868	2.61907	pod	Peroxidase
	CsGy6G028220	1.11841	1.46576	-0.0547263	1.01974	PER73	Peroxidase
	CsGy4G012820	0.651305	2.67174	2.57173	-1.22897	PER54	Peroxidase
	CsGy4G012860	0	2.71832	3.88092	2.63472	PER53	Peroxidase
	CsGy6G002100	-1.23879	2.66069	1.0858	-0.949626	PER52	Peroxidase
	CsGy5G009540	0	1.36583	4.10434	1.0217	PER5	Peroxidase
	CsGy5G009550	0	1.38648	2.40939	-0.017278	PER5	Peroxidase
	CsGy5G009560	0	1.31998	0	-0.796467	PER5	Peroxidase
	CsGy4G018470	1.32193	-0.490212	0.313581	-1.18157	PER47	Peroxidase
	CsGy7G004790	1.72975	1.60864	0.327805	-1.02534	PER43	Peroxidase
	CsGy6G005270	-1.152	1.01205	2.45943	1	PER24	Peroxidase
	CsGy3G030820	0.196468	1.48847	0.430202	-1.1123	PER21	Peroxidase
	CsGy1G012490	2.07313	-1.47567	-0.685414	0.82361	PER19	Peroxidase
	CsGy6G023870	-1.28515	1.236	-0.224473	-0.722437	PAL17.1	Phenylalanine ammonia-lyase
	CsGy6G023880	0.609416	1.58396	2.40563	0.437792	PAL17.1	Phenylalanine ammonia-lyase
	CsGy6G023890	1.90507	1.24382	2.47912	0.10939	PAL17.1	Phenylalanine ammonia-lyase
	CsGy6G023900	2.98078	1.22287	3.45785	1.1901	PAL17.1	Phenylalanine ammonia-lyase
	CsGy6G023910	2.14118	0.99944	3.26369	2.06176	PAL17.1	Phenylalanine ammonia-lyase
	CsGy6G023920	0	2.44269	0.429251	3.88379	PAL17.1	Phenylalanine ammonia-lyase
	CsGy4G002300	4.69546	1.29667	2.99517	1.52893	PAL	Phenylalanine ammonia-lyase
	CsGy4G002310	3.91259	1.32646	3.41392	0.914753	PAL	Phenylalanine ammonia-lyase
	CsGy6G011750	-2.04953	3.2082	0.463247	-0.576702	PAL	phenylalanine ammonia-lyase-like
	CsGy1G024190	0	1.11409	2.11474	-0.591141	MEE23	tetrahydrocannabinolic acid synthase-like
	CsGy3G034390	-0.830014	-1.06354	-1.14698	-0.231676	HIUH	beta-glucosidase 22-like
	CsGy6G015260	0	3.90689	0	0	GSVIVT00023967001	Peroxidase
	CsGy6G015270	0	2.97481	1.59018	-0.992306	GSVIVT00023967001	Peroxidase
	CsGy6G015280	-2.27934	1.92108	1.75506	-0.341546	GSVIVT00023967001	Peroxidase
	CsGy7G004350	-0.860597	1.93063	3.7955	1.39957	GSVIVT00023967001	Peroxidase
	CsGy4G000530	-2.14296	2.18587	-0.0931094	-1.078	DAT	HXXXD-type acyl-transferase family protein
	CsGy2G006820	0	1.18965	3.36146	-0.421296	CYP73A12	cytochrome P450 CYP73A100-like
	CsGy4G008240	-0.278789	2.18689	0.930693	0.346758	COMT	O-methyltransferase, putative
	CsGy3G028190	0.667425	1.34421	3.30392	0.480294	CCR2	cinnamoyl coa reductase
	CsGy3G028210	1.62449	1.5072	3.21473	0.876302	CCR2	cinnamoyl coa reductase
	CsGy7G018410	-0.844182	1.75669	0.82817	-0.368147	CCR1	cinnamoyl coa reductase 1
	CsGy7G007200	-0.340414	2.49786	0.87539	-0.189113	CCOAOMT1	Caffeoyl-CoA O-methyltransferase
	CsGy7G006750	-0.563901	2.48259	2.39926	1.47551	CAD1	cinnamyl alcohol dehydrogenase 1-like
	CsGy4G004710	-0.435025	-0.444323	-1.20105	-0.0404581	BGLU44	beta-glucosidase 44-like
	CsGy1G029400	-1.85058	-2.75046	-1.54762	-0.919163	BGLU24	Beta-glucosidase
	CsGy1G029500	-2.16178	-1.37077	-1.33662	-0.492492	BGLU24	beta-glucosidase 24
	CsGy1G029510	-1.83344	-1.39637	-1.21835	-0.307885	BGLU11	beta-glucosidase 24
	CsGy1G023170	1.58496	1.46045	0.653852	1.50866	BACOVA_02659	beta-glucosidase BoGH3B-like
	CsGy6G036410	2.43653	1.80289	0.640532	0.129283	At5g44400	Berberine bridge enzyme-like 26
	CsGy2G026910	-2.86969	3.16993	-0.415037	0.45816	4CL3	4-coumarate--CoA ligase 2
	CsGy3G027980	-0.874885	1.49582	0.0197407	-0.469358	4CL2	4-coumarate--CoA ligase 1-like
	CsGy7G018100	0	1.29804	3.25439	-0.60921	4CL2	4-coumarate--CoA ligase 2-like
	CsGy7G018110	0	1.29259	3.54844	-0.61557	4CL2	4-coumarate--CoA ligase 1-like
Phenylalanine metabolism	CsGy4G000360	-0.484094	1.35947	0.492693	0.408847	PAT	Aminotransferase
	CsGy6G023870	-1.28515	1.236	-0.224473	-0.722437	PAL17.1	Phenylalanine ammonia-lyase
	CsGy6G023880	0.609416	1.58396	2.40563	0.437792	PAL17.1	Phenylalanine ammonia-lyase
	CsGy6G023890	1.90507	1.24382	2.47912	0.10939	PAL17.1	Phenylalanine ammonia-lyase
	CsGy6G023900	2.98078	1.22287	3.45785	1.1901	PAL17.1	Phenylalanine ammonia-lyase
	CsGy6G023910	2.14118	0.99944	3.26369	2.06176	PAL17.1	Phenylalanine ammonia-lyase
	CsGy6G023920	0	2.44269	0.429251	3.88379	PAL17.1	Phenylalanine ammonia-lyase
	CsGy4G002300	4.69546	1.29667	2.99517	1.52893	PAL	Phenylalanine ammonia-lyase
	CsGy4G002310	3.91259	1.32646	3.41392	0.914753	PAL	Phenylalanine ammonia-lyase
	CsGy6G011750	-2.04953	3.2082	0.463247	-0.576702	PAL	phenylalanine ammonia-lyase-like
	CsGy1G001120	-0.679105	1.33626	-0.0776609	0.656746	maoII	Amine oxidase
	CsGy2G006820	0	1.18965	3.36146	-0.421296	CYP73A12	cytochrome P450 CYP73A100-like
	CsGy7G007200	-0.340414	2.49786	0.87539	-0.189113	CCOAOMT1	Caffeoyl-CoA O-methyltransferase
	CsGy2G026910	-2.86969	3.16993	-0.415037	0.45816	4CL3	4-coumarate--CoA ligase 2
	CsGy3G027980	-0.874885	1.49582	0.0197407	-0.469358	4CL2	4-coumarate--CoA ligase 1-like
	CsGy7G018100	0	1.29804	3.25439	-0.60921	4CL2	4-coumarate--CoA ligase 2-like
	CsGy7G018110	0	1.29259	3.54844	-0.61557	4CL2	4-coumarate--CoA ligase 1-like
MAPK signaling pathway	CsGy1G002880	-0.314228	2.05662	0.722319	-0.428552	RBOHB	respiratory burst oxidase homolog protein A-like isoform X1
	CsGy1G004610	1.32278	0.311669	1.10436	1.43345	WRKY24	probable WRKY transcription factor 33
	CsGy1G009260	1.06114	-0.0563446	0.446728	0.407936	NDPK2	Nucleoside diphosphate kinase
	CsGy1G026710	-2.5289	1.69358	-0.398775	0.968343	PP2C06	probable protein phosphatase 2C 6
	CsGy3G012140	1.31312	0.182201	1.30681	-0.121376	ERF1B	Ethylene-responsive transcription factor 1B
	CsGy3G021650	1.40698	1.24929	2.21842	-1.29582	ERF1B	ethylene-responsive transcription factor 1B-like
	CsGy3G024750	-5.27733	-1.82597	-2.4464	0.988773	PP2C51	probable protein phosphatase 2C 8
	CsGy3G028680	2.66799	0.522494	2.12097	1.3885	WRKY33	probable WRKY transcription factor 26
	CsGy3G028770	-0.172446	0.503048	-0.239743	-1.14994	PYL4	abscisic acid receptor PYL4-like
	CsGy3G038490	2.59245	0.28774	0.944862	0.861663	RBOHC	respiratory burst oxidase homolog protein C
	CsGy4G005240	-0.817374	1.02476	0.267104	1.25202	MPK7	Mitogen-activated protein kinase
	CsGy4G005790	4.17313	0.757224	2.77444	0.34609	ACS1	1-aminocyclopropane-1-carboxylate synthase
	CsGy4G005820	1.34792	2.34863	3.1822	-1.0199	WRKY29	probable WRKY transcription factor 29
	CsGy5G008430	-0.571524	1.11178	1.10547	-1.09687	PYL4	abscisic acid receptor PYL4
	CsGy5G028420	3.07437	1.45862	1.43273	2.03654	CML45	Calcium ion binding protein
	CsGy6G001950	-0.411426	1.35644	2.89352	-1.64796	PYL4	abscisic acid receptor PYL4-like
	CsGy6G031920	2.76158	1.52953	4.69214	-0.478201	CHN48	endochitinase-like
	CsGy6G031930	0.126448	1.59835	3.30161	0.530515	CHN48	endochitinase-like
	CsGy6G031970	0.584963	1.02034	-1.22239	0	CHN48	endochitinase-like
	CsGy6G031980	1.92359	1.02166	1.18225	0.347923	CHN50	Chitinase
	CsGy6G031990	-3.1065	1.63749	1.97909	1.57516	CHN48	endochitinase-like
	CsGy6G032000	-1.87801	1.54573	1.95073	1.88136	CHI2	endochitinase-like
	CsGy6G035490	3.49823	0.883938	1.02103	-0.352742	FLS2	Leucine-rich receptor-like protein kinase family protein
	CsGy7G006240	0.436395	1.35378	0.101102	0.581771	At2g14610	Cysteine-rich venom protein
	MSTRG.18783	0	3.97881	-1.36538	3.37234	At2g14610	PREDICTED: pathogenesis-related protein 1-like [Cucumis sativus]
Glutathione metabolism	CsGy3G024440	0.282858	-0.5585	0.304547	1.34827	TSO2	Ribonucleoside-diphosphate reductase small subunit
	CsGy5G000510	0.208399	-1.44025	-0.121379	0.13217	SPMS	Polyamine aminopropyltransferase
	CsGy4G007420	-0.480047	0.759978	1.02185	3.00166	PARC	Glutathione S-transferase
	CsGy2G005290	-4.75489	2.00899	2.14684	0.706269	Os02g0794700	Cytosol aminopeptidase family protein
	CsGy5G014650	-0.539143	0.90289	0.415905	1.27685	MGST3	Microsomal glutathione s-transferase
	CsGy1G004050	1.89171	1.07025	0.27158	0.871452	HSP26-A	probable glutathione S-transferase
	CsGy3G011370	0.106915	1.74044	0.699229	4.20451	HSP26-A	Glutathione S-transferase
	CsGy3G011390	0.728356	1.57143	1.33411	4.00582	HSP26-A	Glutathione S-transferase
	CsGy3G011410	0.695972	0.466902	-0.0739154	3.88382	HSP26-A	probable glutathione S-transferase
	CsGy4G014710	-4.71712	0.269581	0.196191	2.5491	HSP26-A	probable glutathione S-transferase
	CsGy4G014770	0	-0.273338	-0.420774	6.14249	HSP26-A	probable glutathione S-transferase
	CsGy1G005300	0.338949	1.14792	0.832382	4.05394	GSTU9	Glutathione s-transferase
	CsGy4G014680	0.946555	-0.298516	1.19615	1.5456	GSTU8	glutathione S-transferase U8-like
	CsGy4G014700	0	2.09359	-1.2123	4.28187	GSTU8	probable glutathione S-transferase
	CsGy4G014780	-1.02857	1.58496	-1.38148	5.14711	GSTU8	probable glutathione S-transferase
	CsGy4G014790	-1.2979	0.162057	-0.518873	4.26953	GSTU8	probable glutathione S-transferase
	CsGy4G007400	1.72265	0.687513	0.52229	0.243155	GSTU25	Glutathione S-transferase
	CsGy3G030530	-0.627398	0.443311	0.489162	1.52288	GSTL3	glutathione S-transferase L3-like
	CsGy2G022360	-0.33602	-2.24812	-0.721562	0.116545	GGCT2;2	Gamma-glutamylcyclotransferase
	CsGy4G003080	0.0130562	1.09054	0.96696	0.283413	CSA	Glutathione peroxidase
	CsGy4G006060	-0.112706	-0.548762	0.645782	1.45945	At5g41670	6-phosphogluconate dehydrogenase, decarboxylating
	CsGy5G017960	-0.303	-0.275876	0.12843	1.10235	At5g14590	Isocitrate dehydrogenase [NADP]
	CsGy7G015700	-2.25615	1.21275	1.05336	2.25486	APIC	Glutathione S-transferase
Sulfur metabolism	CsGy1G032940	0.467505	1.24912	0.703881	0.651394	yqjG	glutathionyl-hydroquinone reductase YqjG isoform X1
	CsGy2G020180	1.14278	1.05575	0.465004	0.685502	TRXH	Thioredoxin
	CsGy3G005410	1.112	-1.03148	0.413423	0.836049	THI1	Thiamine thiazole synthase, chloroplastic
	CsGy3G011150	0.453615	-2.63618	-2.29998	-0.666213	SDI1	protein SULFUR DEFICIENCY-INDUCED 1
	CsGy3G012850	-0.0663281	-1.19215	-0.655854	0.127425	APS1	Sulfate adenylyltransferase
	CsGy3G018420	0.459542	-1.98698	0.181866	-0.684235	NIR1	Sulfite reductase [NADPH] hemoprotein beta-component
	CsGy3G025950	1.31041	-0.446125	-0.842175	0.0400994	ERD3	S-adenosyl-L-methionine-dependent methyltransferases superfamily protein
	CsGy5G000110	2.49039	-2.33575	-2.64506	0.0579288	LSU1	Protein RESPONSE TO LOW SULFUR 2
	CsGy5G022790	0.848217	-1.54188	-0.90114	-0.50062	TRX2	Thioredoxin
	CsGy6G019750	-0.452478	0.603716	0.47095	1.53399	PDI	Protein disulfide-isomerase
	CsGy6G025630	0.170798	-1.30221	-0.72092	0.204422	At5g64030	S-adenosyl-L-methionine-dependent methyltransferases superfamily protein
	CsGy6G031770	-1.25193	0.609701	0.236454	1.59102	DIN1	thiosulfate sulfurtransferase 16, chloroplastic
	CsGy6G033030	1.40633	-2.48087	-2.09554	-0.807229	2021-04-01	Phosphoadenosine phosphosulfate reductase
	CsGy7G002280	-1.77662	-0.824924	0.0769072	0.105646	AAT1	3-ketoacyl-CoA thiolase
	CsGy7G018970	0.177137	0.528411	0.540734	1.9642	--	Lactoylglutathione lyase / glyoxalase I family protein
SA	CsGy1G001860	0.832446	1.12282	0.898878	1.58575	EDS1	protein EDS1L-like
	CsGy3G035280	-0.716295	0.367961	-0.136011	0.296958	TGA21	bZIP transcription factor family protein
	CsGy7G006240	0.436395	1.35378	0.101102	0.581771	At2g14610	Cysteine-rich venom protein
	MSTRG.18783	0	3.97881	-1.36538	3.37234	At2g14610	PREDICTED: pathogenesis-related protein 1-like [Cucumis sativus]
ABA	CsGy7G012290	-0.543008	0.28873	-0.243613	0.0572441	PYL5	Abscisic acid receptor
	CsGy1G021750	0	-0.909065	-1.84421	4.59724	PYL4	abscisic acid receptor PYL12-like
	CsGy4G015470	0.0130777	0.364233	0.805427	-0.789741	PYL4	abscisic acid receptor PYL4
	CsGy5G008430	-0.571524	1.11178	1.10547	-1.09687	PYL4	abscisic acid receptor PYL4
	CsGy3G028770	-0.172446	0.503048	-0.239743	-1.14994	PYL4	abscisic acid receptor PYL4-like
	CsGy6G001950	-0.411426	1.35644	2.89352	-1.64796	PYL4	abscisic acid receptor PYL4-like
	CsGy3G008160	-0.20513	-0.200816	-0.0712062	-0.209422	PYL3	abscisic acid receptor PYL9
	CsGy7G007120	-1.6261	0.770883	-0.531077	0.574035	ABF3	ABSCISIC ACID-INSENSITIVE 5-like protein 4 isoform X1
	CsGy3G002090	-1.04072	0.555304	-0.0891244	0.00924732	SRK2A	serine/threonine-protein kinase SAPK3-like
IAA	CsGy6G034510	-0.484805	-0.189554	-0.736519	-0.0428176	ARF3	Auxin response factor
	CsGy4G006490	-0.697107	-0.03693	0.103665	-0.113112	ARF9	Auxin response factor
	CsGy3G007730	-3.17042	-0.97548	-0.211864	-0.0580844	SAUR32	Auxin-responsive family protein
	CsGy2G010820	1.17152	0.105633	-0.118084	0.159498	AUX22B	Auxin-responsive protein
	CsGy3G012700	-0.0610313	-0.550485	-0.913712	-0.38643	AUX22B	Auxin-responsive protein
	CsGy2G003100	1.07363	-0.635758	-1.36056	-1.01577	AUX22D	Auxin-responsive protein
	CsGy2G010810	0.864446	0.266557	-0.712702	-0.212695	IAA14	Auxin-responsive protein
	CsGy1G032200	-0.286612	0.364509	-1.33531	-0.556961	IAA16	Auxin-responsive protein
	CsGy1G016970	1.11334	0.458061	-2.50147	-0.521346	IAA29	Auxin-responsive protein
	CsGy3G012680	0	-0.056494	0	-0.21135	IAA7	Auxin-responsive protein
	CsGy2G021610	-0.46314	-0.148128	-0.569505	-0.542114	IAA9	Auxin-responsive protein
	CsGy6G028990	0.0584905	0.383372	0.499941	0.51105	IAA9	Auxin-responsive protein
	CsGy6G010290	0	2.45056	2.85626	3.85345	GH3.6	indole-3-acetic acid-amido synthetase GH3.6-like
	CsGy3G017950	-0.903463	0.794126	0.252964	0.526152	GH3.1	probable indole-3-acetic acid-amido synthetase GH3.1
	CsGy6G033850	0.681741	-0.63408	0.0401855	-0.318669	AFB2	protein TRANSPORT INHIBITOR RESPONSE 1-like
	CsGy3G008270	-0.268882	0.494207	0.298326	0.518953	GH3.5	Putative indole-3-acetic acid-amido synthetase GH3.5
JA	CsGy1G028110	0.565414	-0.384827	3.42715	1.13985	TIFY10A	protein TIFY 10a
	CsGy7G020660	0.134938	0.355951	1.45489	-0.0856565	TIFY10B	protein TIFY 10B-like
	CsGy3G026410	1.35727	0.888022	2.43968	-0.418083	TIFY10A	protein TIFY 10c-like
	CsGy1G007170	0.336851	-0.678964	1.16249	-0.435822	TIFY6B	protein TIFY 6B-like isoform X1
	CsGy6G007460	-0.563715	0.928657	0.553063	1.26801	TIFY9	protein TIFY 9
	CsGy3G001550	0.533342	0.537237	1.17811	1.27929	MYC2	transcription factor MYC2-like
	CsGy3G008270	-0.268882	0.494207	0.298326	0.518953	GH3.5	Putative indole-3-acetic acid-amido synthetase GH3.5
	CsGy3G044130	-0.575955	-0.0608717	0.107926	-0.211017	MYC2	transcription factor MYC2-like
	CsGy2G024270	1.35802	0.208477	-0.383467	-0.121523	OPR1	putative 12-oxophytodienoate reductase 11
	CsGy7G007610	-1.28052	-0.528119	0.415216	0.174527	AOS3	allene oxide synthase 3-like
	CsGy7G007620	-1.75118	0.0674109	0.86816	-0.0948592	AOS3	allene oxide synthase 3-like
	CsGy2G019490	-0.260294	0.365957	0.859507	1.40052	AOS1	allene oxide synthase 1, chloroplastic
